# Supplementary material for: IL-37 Gene Modification Enhances the Protective Effects of Mesenchymal Stromal Cells on Intestinal Ischemia Reperfusion Injury
Source: Hindawi journal article supplement (doi:10.1155/2020/8883636), 2020-08-08

## Supplementary figure

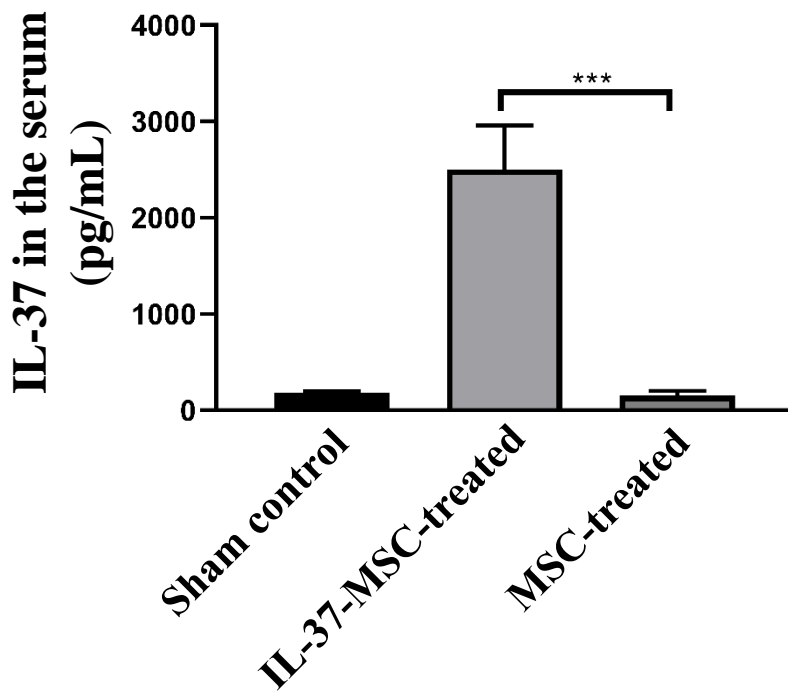

Supplement: f1 [file 8883636.f1.pdf]
